# Supplementary material
Source: PubMed Central journal article supplement (PMC3037716)

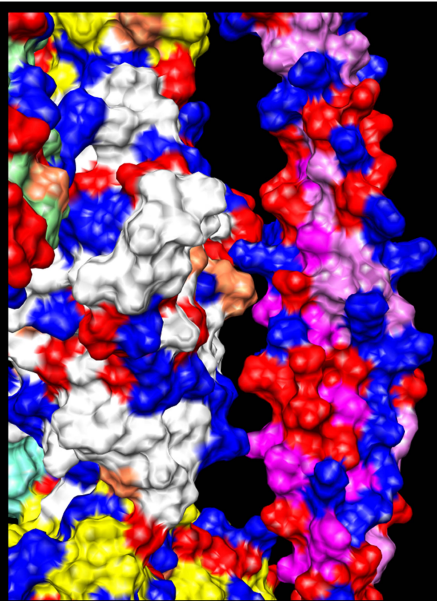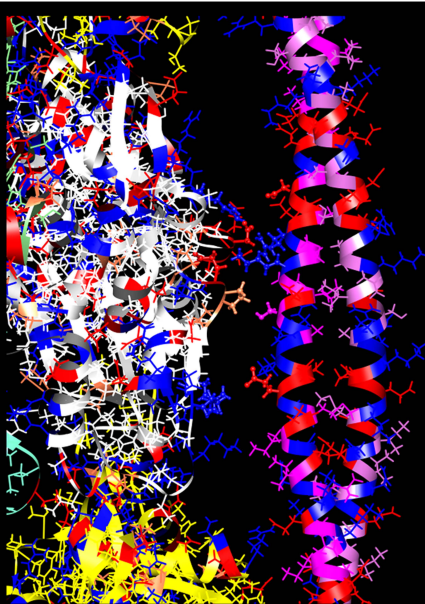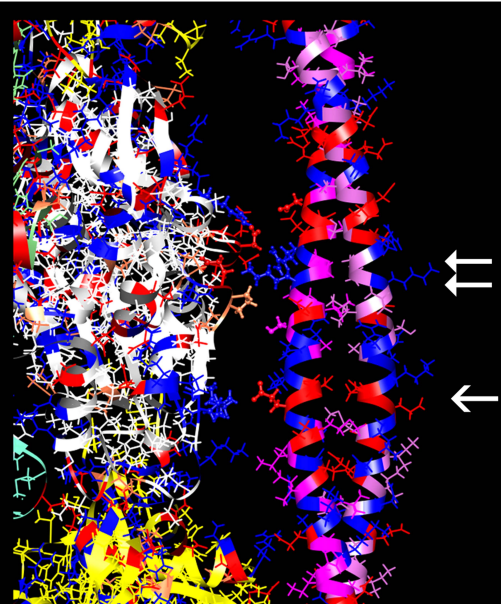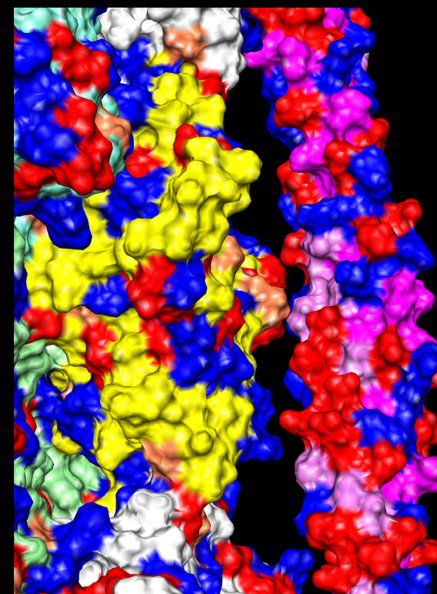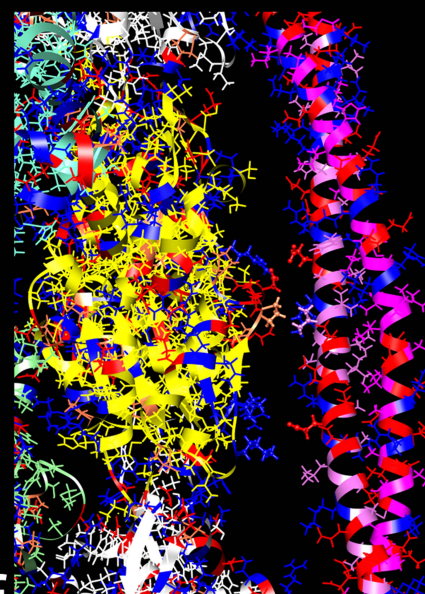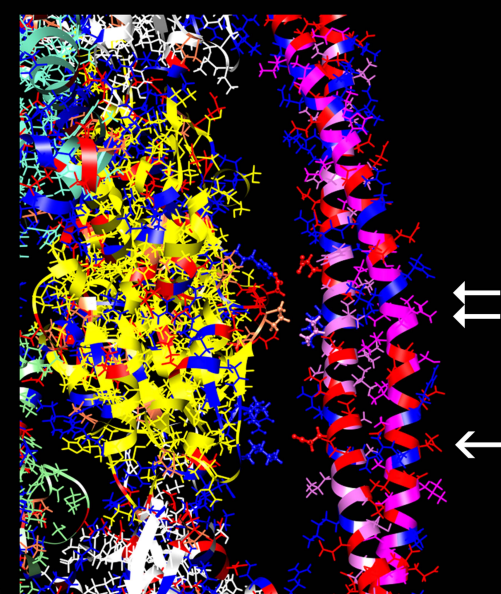

Supplementary Data Item 1. Enlargement of Figure 4b-g

Supplement: mmc1.pdf [file mmc1.pdf]

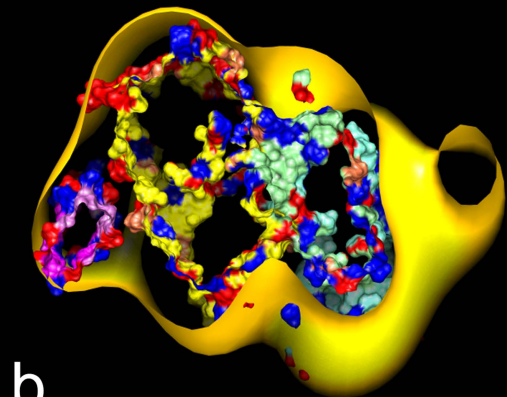

b

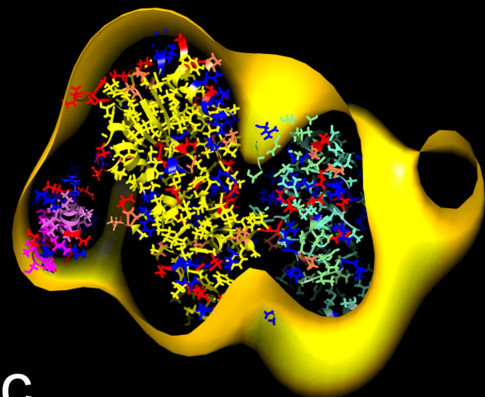

c

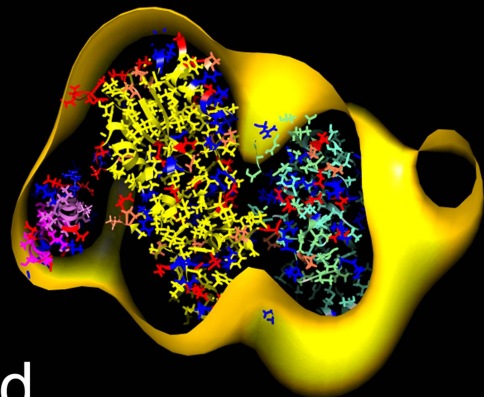

d

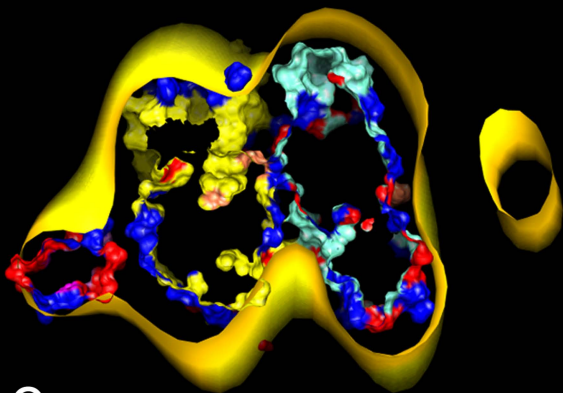

e

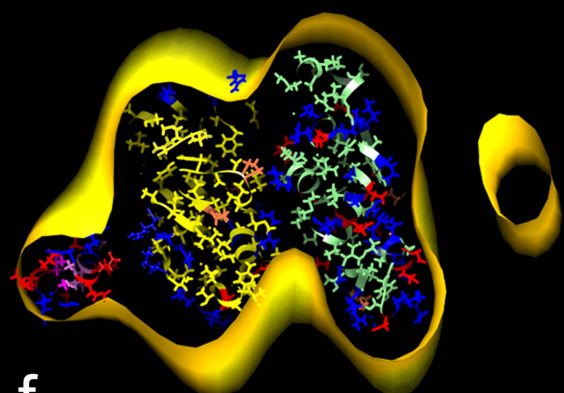

f

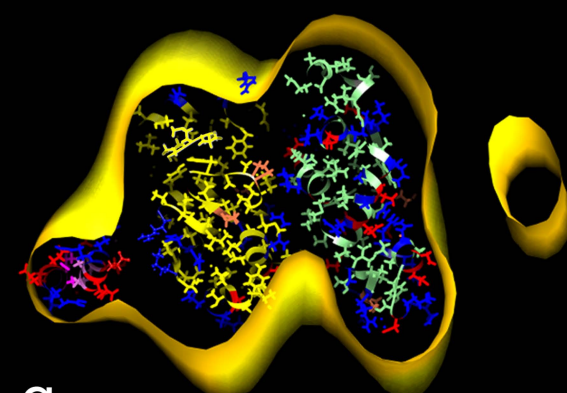

g

Supplement: mmc2.pdf [file mmc2.pdf]
